# Supplementary material for: The use of high-throughput small RNA sequencing reveals differentially expressed microRNAs in response to aster yellows phytoplasma-infection in Vitis vinifera cv. ‘Chardonnay’
Source: PubMed Central journal article supplement (PMC5558978; doi:10.1371/journal.pone.0182629), 2017-08-16

| vvi-miRNA                           | Sequence (5'-3')         | Length (nt) | Avg of normalised read counts <sup>†</sup> |         | DESeq results (H vs AY) |         |                        |
|-------------------------------------|--------------------------|-------------|--------------------------------------------|---------|-------------------------|---------|------------------------|
|                                     |                          |             | H                                          | AY      | log2FC                  | p-value | Adj. p-value (q-value) |
| vvi-miR319b,c,f                     | UUGGACUGAAGGGAGCUCUCCU   | 21          | 527.50                                     | 1811.90 | 1.31                    | 0.027   | 0.150                  |
| vvi-miR319e <sup>¶</sup>            | UUUGGACUGAAGGGAGCUCUCCU  | 21          | 6.07                                       | 25.24   | 1.49                    | 0.008   | 0.108                  |
| vvi-miR3627-5p                      | UUGUCGCAGGAGAGACGGCACU   | 22          | 1.89                                       | 5.05    | 1.22                    | 0.009   | 0.060                  |
| vvi-miR3629ab-3p,c-5p               | GGCUGCUGAGAAAAUGUAGGA    | 21          | 25.95                                      | 8.95    | -1.15                   | 0.031   | 0.150                  |
| vvi-miR395a,b,c,d,e,f,g,h,i,j,k,l,m | CUGAAGUGUUUGGGGGAACUC    | 21          | 1642.99                                    | 6002.63 | 1.23                    | 0.049   | 0.220                  |
| vvi-miR399a,h                       | UGCCAAAGGAGAAUUGCCCUG    | 21          | 10.08                                      | 2.97    | -1.34                   | 0.016   | 0.100                  |
| vvi-miR399e <sup>¶</sup>            | UGCCAAAGGAGAUUUGCCCUG    | 21          | 463.24                                     | 103.94  | -1.55                   | 0.009   | 0.060                  |
| vvi-miR479 <sup>¶</sup>             | UGUGGUAAUUGGUUCGGCUCAUC  | 22          | 71.26                                      | 24.82   | -1.16                   | 0.030   | 0.150                  |
| vvi-miR3638-5p                      | UGUGCCUUUUCGCGCUUGUUGCUA | 24          | 1.57                                       | 0.25    | -0.88                   | 0.049   | 0.115                  |

H: Healthy sample group

AY: AY phytoplasma-infected sample group

<sup>¶</sup>Validated using real-time RT-qPCR

<sup>†</sup>Average of reads per million mapped reads (RPM) between three biological replicates

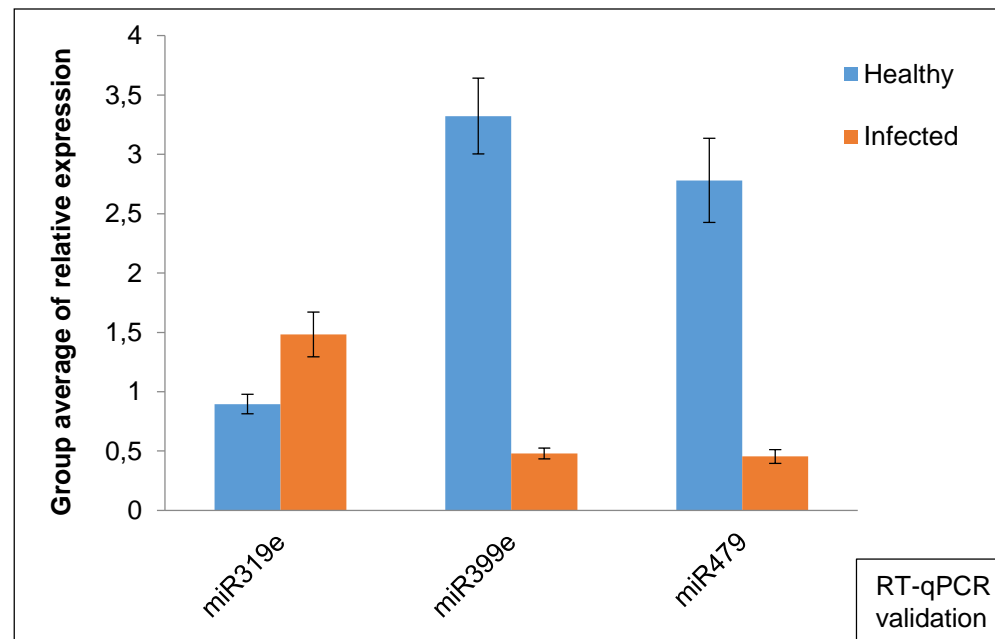

Supplement: pone.0182629.s004.pdf [file pone.0182629.s004.pdf]
