# Supplementary material for: The use of high-throughput small RNA sequencing reveals differentially expressed microRNAs in response to aster yellows phytoplasma-infection in Vitis vinifera cv. ‘Chardonnay’
Source: PubMed Central journal article supplement (PMC5558978; doi:10.1371/journal.pone.0182629), 2017-08-16

>vvi-miRn003

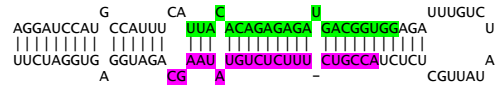

>vvi-miRn010.2 (vvi-miR529\_new)

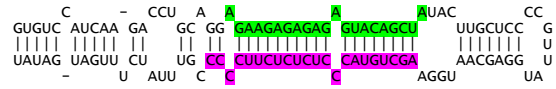

>vvi-miRn022a (vvi-miR1446\_new)

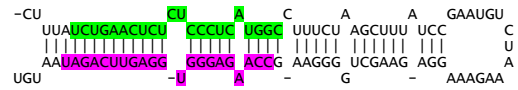

>vvi-miRn003

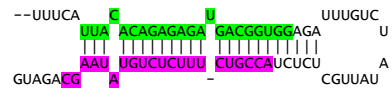

>vvi-miRn137

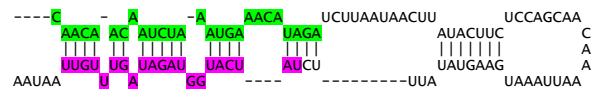

Supplement: pone.0182629.s001.pdf [file pone.0182629.s001.pdf]
